# Supplementary material for: First Evidence Indicates the Physiology- and Axial-Myopia-Dependent Profiles of Steroid Hormones in Aqueous Humor
Source: MDPI journal article supplement (doi:10.3390/metabo12121220), 2022-12-05
Supplement: s1 [file s1]

## Supplementary Materials

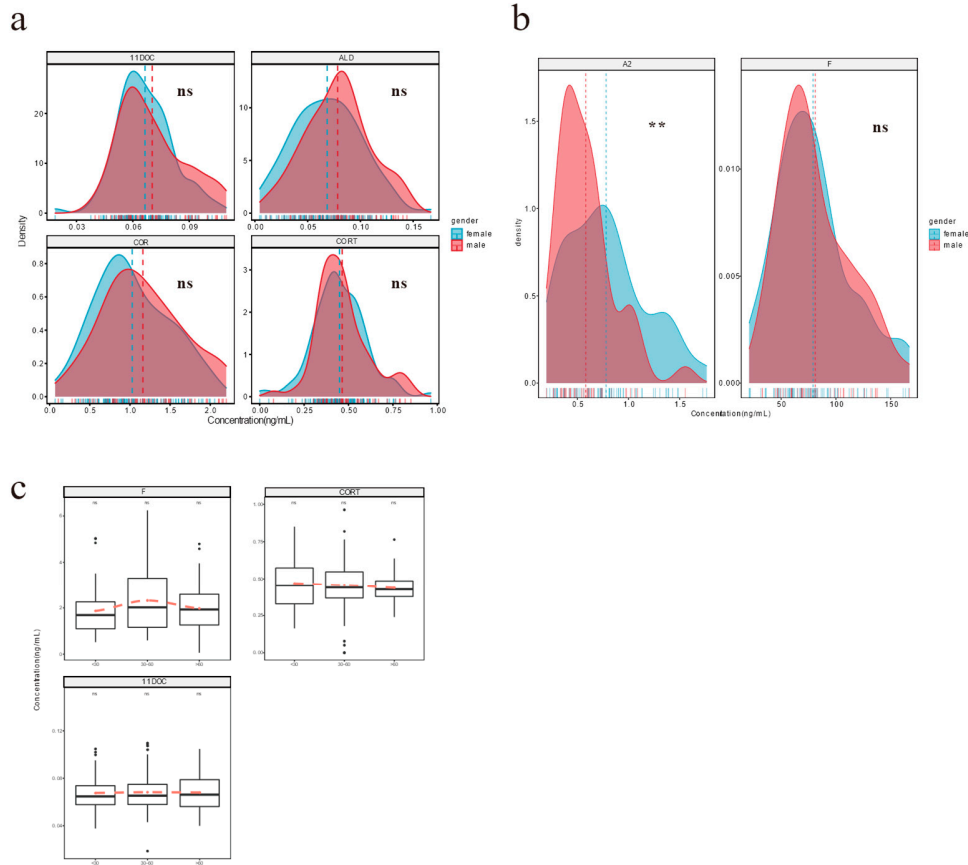

**Figure S1.** Steroid hormone distribution by age and sex. a) Steroid hormones distribution in males and females (ns represents the no significant difference). b) Steroid hormones (F and A2) distribution in males and females of plasma (\*\* represents the p value <0.01, ns represents the no significant difference). .c) Steroid hormones among different age groups.

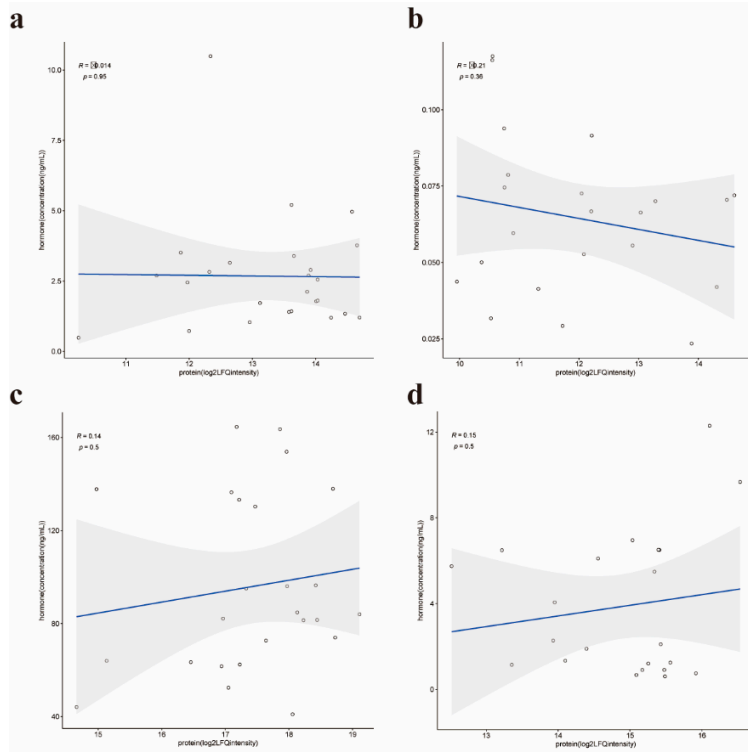

**Figure S2** The abundance correlation of carrier proteins and steroid hormones. a) The abundance correlation plot for CBG and glucocorticoids in AHs. b) The abundance correlation plot for SHBG and sex hormones in AHs. c) The abundance correlation plot for CBG and glucocorticoids in plasmas. d) The abundance correlation plot for SHBG and sex hormones in plasmas.

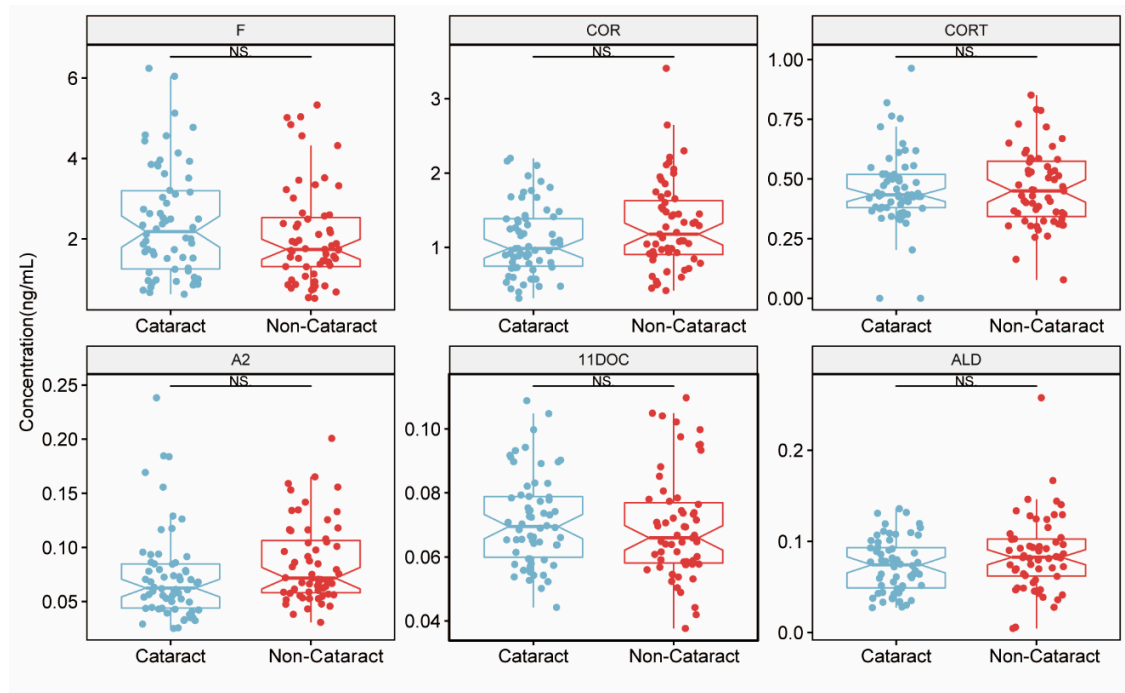

**Figure S3** Box plot for steroid hormone concentrations in the cataract and normal groups (NS represents no significance difference)

**Table S1.** Clinical information of donors

| Case Number   | Case Group | Age | Gender | Eye | Diopter            | Degree of Turbidity | AL (od mm) | AL (os mm) | Correspond Plasma |
|---------------|------------|-----|--------|-----|--------------------|---------------------|------------|------------|-------------------|
| 20201225P0037 | ARC        | 73  | female | od  | -3.25DC*177        | C4N4P3              | 22         | 21.8       | yes               |
| 20201225P0002 | ARC        | 85  | female | od  | -1.50DC*94         | C3N3P2              | 23.27      | 23.24      | yes               |
| 20201225P0005 | ARC        | 53  | female | od  | -3.75DS-0.50DC*92  | C2N3P4              | 22.24      | 22.11      | yes               |
| 20201225P0067 | ARC        | 79  | male   | od  | -0.25DS-0.70DC*5   | C2N3P2              | 23.74      | 23.82      | yes               |
| 20201225P0149 | ARC        | 68  | female | os  | -0.25DS-0.60DC*9   | C2N3P2              | 23.07      | 23.05      | yes               |
| 20201225P0041 | ARC        | 69  | female | od  | -0.25DS-0.30DC*92  | C3N2P2              | 22.34      | 22.52      | yes               |
| 20201225P0012 | ARC        | 84  | male   | od  | -0.75DC*82         | C3N4P3              | 23.58      | 23.56      | yes               |
| 20201225P0034 | ARC        | 77  | male   | od  | -2.00DS-2.50DC*48  | C2N3P2              | 24.2       | 23.84      | yes               |
| 20201225P0003 | ARC        | 82  | male   | od  | -2.00DS-3.00DC*110 | C2N3P2              | 24.11      | 24.29      | yes               |
| 20201225P0152 | ARC        | 73  | male   | os  | +2.00DS-3.25DC*70  | C4N3P3              | 24.16      | 23.95      | yes               |
| 20201225P0137 | ARC        | 91  | male   | os  | -4.5DC*90          | C4N4P4              | 22.54      | 22.56      | yes               |
| 20201225P0121 | ARC        | 65  | female | os  | +1.50DC*172        | C3N2P2              | 23         | 23.12      | yes               |
| 20200918P0020 | ARC        | 67  | female | od  | -0.25DC*132        | C2N2P2              | 24.62      | 24.28      | yes               |
| 20200918P0013 | ARC        | 71  | female | od  | +0.75DS+1.00DC*90  | C2N3P2              | 23.4       | 23.66      | yes               |
| 20200918P0030 | ARC        | 76  | male   | od  | -1.50DS-2.00DC*96  | C3N3P3              | 23.12      | 23.41      | yes               |
| 20200918P0019 | ARC        | 73  | male   | od  | +0.75DS+1.00DC*180 | C3N3P3              | 24.29      | 24.17      | yes               |
| 20200918P0014 | ARC        | 77  | female | os  | -0.50DC*15         | C2N3P2              | 23.39      | 23.55      | yes               |
| 20200918P0032 | ARC        | 74  | male   | od  | -1.50DS            | C3N3P3              | 23.39      | 23.33      | yes               |
| 20200918P0044 | ARC        | 78  | male   | od  | -0.50DC*135        | C4N4P2              | 23.56      | 23.7       |                   |
| 20200918P0046 | ARC        | 50  | male   | os  | -0.75DC*77         | C3N3P3              | 23.33      | 23.58      |                   |
| 20201225P0015 | ARC        | 61  | female | od  | -0.25DC*50         | C2N3P2              | 22.01      | 22.1       |                   |
| 20201225P0147 | ARC        | 80  | female | os  | -0.25DC*149        | C3N3P2              | 24.6       | 24.72      |                   |
| 20201225P0072 | ARC        | 69  | female | os  | +3.00DS-3.00DC*25  | C4N4P3              | 24.54      | 24.8       |                   |
| 20201225P0140 | ARC        | 62  | female | od  | +2.00DS            | C2N2P2              | 22.56      | 22.61      |                   |
| 20201225P0160 | ARC        | 61  | male   | os  | -1.25DC*77         | C2N3P2              | 24.11      | 23.92      |                   |
| 20201225P0033 | ARC        | 83  | male   | os  | -2.00DC*85         | C4N3P3              | 23.3       | 23.27      |                   |
| 20201225P0043 | ARC        | 64  | female | os  | -0.75DC*153        | C2N3P2              | 23.66      | 23.63      |                   |
| 20201225P0095 | ARC        | 66  | male   | od  | +1.25DS+0.25DC*75  | C3N3P2              | 23.99      | 23.88      |                   |
| 20201225P0009 | ARC        | 63  | female | od  | +3.00DS            | C2N3P2              | 23.74      | 23.32      |                   |
| 20201225P0071 | ARC        | 80  | male   | od  | -2.50DC*111        | C2N3P2              | 22.22      | 22.8       | yes               |
| 20201225P0019 | DC         | 45  | female | od  | -0.50DC*160        | C4N4P3              | 24.47      | 24.34      | yes               |
| 20201225P0133 | DC         | 79  | female | od  | -0.77DC*101        | C2N3P2              | 22.43      | 22.33      | yes               |
| 20201225P0065 | DC         | 49  | male   | od  | -1.75DS-0.75DC*85  | C2N2P2              | 23.94      | 23.93      | yes               |
| 20201225P0081 | HM         | 27  | male   | od  | -6.00DS-2.50DC*5   |                     | 27.99      | 24.48      | yes               |
| 20201225P0045 | HM         | 30  | female | od  | -8.37DS-2.37DC*178 |                     | 27.05      | 26.23      | yes               |
| 20200918P0015 | HM         | 30  | female | od  | -7.00DS-1.25DC*172 |                     | 25.09      | 25.31      | yes               |
| 20200918P0003 | HM         | 27  | male   | od  | -5.75DS            |                     | 26.66      | 26.68      | yes               |
| 20200918P0037 | HM         | 27  | female | od  | -5.00DS-1.25DC*80  |                     | 26.76      | 26.67      | yes               |
| 20200918P0022 | HM         | 36  | female | od  | -11.62DS-1.12DC*16 |                     | 27.2       | 27.34      | yes               |
| 20200918P0017 | HM         | 26  | female | od  | -6.12DS-0.87DC*6   |                     | 25.56      | 25.48      | yes               |
| 20200918P0048 | HM         | 21  | female | od  | -7.25DS-0.87DC*179 |                     | 25.47      | 25.48      |                   |
| 20200918P0043 | HM         | 20  | male   | od  | -14.00DS-4.50DC*90 |                     | 29.92      | 28.42      |                   |

|               |     |    |        |    |                     |        |       |       |     |
|---------------|-----|----|--------|----|---------------------|--------|-------|-------|-----|
| 20201225P0029 | HM  | 36 | female | od | -7.25DS             |        | 26.92 | 30.27 |     |
| 20201225P0013 | HM  | 30 | female | od | -5.62DS-0.37DC*51   |        | 26.16 | 26.01 |     |
| 20201225P0135 | HM  | 25 | female | od | -5.87DS-1.62DC*175  |        | 26.51 | 27.07 |     |
| 20201225P0134 | HM  | 23 | female | od | -8.37DS-1.00DC*4    |        | 27.86 | 27.77 |     |
| 20201225P0079 | HM  | 45 | female | od | -6.25DS-3.50DC*176  |        | 25.73 | 25.58 |     |
| 20201225P0151 | HM  | 36 | male   | od | -5.50DS             |        | 26.84 | 26.77 | yes |
| 20201225P0083 | HM  | 19 | male   | od | -5.87DS-0.37DC*46   |        | 26    | 26    | yes |
| 20201225P0111 | HM  | 28 | female | od | -10.50DS            |        | 27.96 | 27.19 | yes |
| 20201225P0044 | HM  | 31 | female | od | -9.00DS-5.50DC*180  |        | 26.95 | 26.98 | yes |
| 20201225P0153 | HM  | 32 | female | od | -13.50DS            |        | 30.18 | 29.81 | yes |
| 20201225P0061 | HM  | 24 | female | od | -11.25DS-1.50DC*10  |        | 26    | 25.82 | yes |
| 20201225P0105 | HM  | 25 | female | od | -5.25DS             |        | 26.32 | 26.24 | yes |
| 20201225P0008 | HM  | 26 | female | od | -6.75DS-0.25DC*93   |        | 25.49 | 25.51 | yes |
| 20201225P0051 | HM  | 39 | female | od | -21.00DS-3.00DC*10  |        | 25.79 | 26.35 | yes |
| 20201225P0084 | HM  | 33 | male   | od | -7.00DS             |        | 25.79 | 26.35 | yes |
| 20201225P0040 | HM  | 18 | male   | od | -8.62DS-1.87DC*180  |        | 26.66 | 26.73 | yes |
| 20201225P0023 | HM  | 35 | female | od | -6                  |        | 26    | 26    | yes |
| 20201225P0154 | HM  | 28 | male   | od | -12.50DS-0.75DC*228 |        | 28.95 | 28.49 | yes |
| 20201225P0128 | HM  | 23 | female | od | -10.50DS            |        | 26    | 26    | yes |
| 20201225P0062 | HM  | 23 | male   | od | -12.50DS-3.50DC*158 |        | 28.89 | 29.1  | yes |
| 20201225P0110 | HM  | 23 | female | od | -9.25DS-0.62DC*2    |        | 27    | 27.5  | yes |
| 20201225P0001 | HM  | 28 | female | od | -6.75DS             |        | 25.36 | 25.22 | yes |
| 20201225P0122 | HM  | 28 | male   | od | -10.00DS-2.50DC*170 |        | 27.67 | 27.34 | yes |
| 20201225P0060 | HM  | 19 | male   | od | -9.50DS-1.75DC*180  |        | 26    | 26    | yes |
| 20201225P0119 | HM  | 23 | female | od | -10.00DS-2.00DC*180 |        | 28.83 | 29.19 | yes |
| 20201225P0139 | HM  | 26 | male   | od | -5.25DS-2.25DC*174  |        | 27.13 | 26.98 | yes |
| 20201225P0118 | HM  | 42 | female | od | -7.62DS-0.25DC*21   |        | 26.43 | 26.41 | yes |
| 20200918P0021 | HM  | 24 | female | od | -7.50DS-0.50DC*2    |        | 26    | 26    | yes |
| 20200918P0012 | HM  | 27 | female | od | -8.12DS-1.00DC*5    |        | 26.22 | 25.63 | yes |
| 20200918P0008 | HM  | 24 | female | od | -6.87DS-2.87DC*6    |        | 25.97 | 26.13 | yes |
| 20200918P0039 | HM  | 27 | female | od | -5.12DS-0.37DC*39   |        | 26.18 | 26.11 | yes |
| 20200918P0036 | HMC | 51 | female | od | -8.00DS-0.75DC*110  | C2N3P2 | 26.79 | 26.68 | yes |
| 20200918P0004 | HMC | 52 | male   | od | -16.00DS-0.75DC*4   | C2N2P2 | 30.61 | 29.17 | yes |
| 20200918P0035 | HMC | 53 | male   | os | -8.50DS-1.50DC*95   | C2N2P2 | 30.32 | 28.9  | yes |
| 20200918P0026 | HMC | 53 | male   | od | -11.00DS-2.00DC*70  | C2N3P2 | 28.4  | 27.98 | yes |
| 20200918P0007 | HMC | 53 | female | od | -7.50DS-1.00DC*90   | C2N2P2 | 26.8  | 26.22 | yes |
| 20200918P0018 | HMC | 31 | male   | os | -9.25DS             | C2N2P1 | 25.95 | 25.89 | yes |
| 20200918P0011 | HMC | 51 | male   | os | -10.00DS-0.50DC*25  | C4N4P3 | 28.16 | 28.82 | yes |
| 20200918P0001 | HMC | 46 | female | os | -9.00DS/-0.50DC*60  | C2N2P2 | 26.63 | 25.77 | yes |
| 20200918P0005 | HMC | 50 | female | od | -10.00DS            | C2N2P2 | 28.21 | 28.67 | yes |
| 20200918P0028 | HMC | 42 | male   | os | -9.00DS-0.750DC*25  | C3N2P3 | 25.36 | 27.7  | yes |
| 20200918P0034 | HMC | 47 | male   | os | -11.25DS-1.50DC*143 | C2N2P2 | 28.9  | 28.15 | yes |
| 20200918P0038 | HMC | 44 | female | od | -2.75DS             | C2N2P2 | 25.89 | 25.7  | yes |
| 20200918P0002 | HMC | 54 | male   | os | -7.75DS-2.25DC*174  | C2N2P2 | 27.22 | 27.6  | yes |

|               |     |    |        |    |                    |        |       |       |     |
|---------------|-----|----|--------|----|--------------------|--------|-------|-------|-----|
| 20200918P0016 | LM  | 22 | female | od | -5.87DS-0.50DC*2   |        | 25.89 | 25.83 | yes |
| 20200918P0047 | LM  | 30 | female | od | -5.50DS-0.25DC*2   |        | 24.89 | 24.88 |     |
| 20201225P0066 | LM  | 26 | female | od | -4.50DS-1.00DC*10  |        | 24.78 | 25.02 |     |
| 20201225P0014 | LM  | 35 | female | od | -4.75DS-1.12DC*150 |        | 24.6  | 24.16 |     |
| 20201225P0097 | LM  | 26 | female | od | -7.00DS            |        | 24.45 | 24.46 |     |
| 20201225P0059 | LM  | 34 | male   | od | -4.50DS-0.37DC*136 |        | 25.32 | 25.37 |     |
| 20201225P0021 | LM  | 30 | female | od | -5.00DS-1.50DC*60  |        | 24.96 | 24.4  |     |
| 20201225P0098 | LM  | 27 | female | od | -4.12DS-0.87DC*13  |        | 24.91 | 24.38 |     |
| 20201225P0126 | LM  | 24 | female | od | -5.50DS-1.00DC*175 |        | 26.08 | 25.83 |     |
| 20201225P0068 | LM  | 26 | female | od | -4.50DS            |        | 25.14 | 25.09 |     |
| 20201225P0017 | LM  | 31 | female | od | -5.25DS            |        | 25.31 | 25.34 |     |
| 20201225P0082 | LM  | 37 | female | od | -3.75DS            |        | 23.99 | 23.93 |     |
| 20201225P0016 | LM  | 18 | female | od | -5.50DS-1.50DC*2   |        | 25.72 | 26.12 |     |
| 20201225P0091 | LM  | 26 | female | od | -3.50DS-1.00DC*171 |        | 24.08 | 24.65 | yes |
| 20201225P0093 | LM  | 29 | female | od | -5.50DS-0.62DC*87  |        | 25.27 | 25.77 | yes |
| 20201225P0094 | LM  | 22 | male   | od | -7.75DS-1.25DC*8   |        | 24.99 | 24.61 | yes |
| 20200918P0027 | LM  | 33 | female | od | -5.00DS            |        | 23    | 23    | yes |
| 20200918P0031 | ARC | 68 | male   | od | -0.25DC*45         | C2N3P3 | 23.78 | 23.33 | yes |
| 20200918P0040 | ARC | 60 | male   | os | -0.50DC*50         | C2N2P2 | 24.63 | 24.78 | yes |
| 20201225P0030 | ARC | 66 | male   | od | +0.90DC*104        | C3N3P2 | 24.03 | 23.6  | yes |
| 20201225P0052 | ARC | 73 | female | od | -0.50DC*86         | C3N4P2 | 22.67 | 22.86 | yes |
| 20201225P0116 | ARC | 83 | male   | os | -1.75DC*91         | C2N3P3 | 23.58 | 23.58 | yes |
| 20201225P0108 | ARC | 84 | female | od | -1.00DC*133        | C3N4P2 | 22.62 | 22.52 | yes |
| 20201225P0085 | ARC | 73 | female | od | -1.00DC*78         | C2N3P2 | 22.6  | 22.69 | yes |
| 20201225P0109 | ARC | 89 | male   | od | -1.50DC*78         | C3N3P3 | 24.35 | 24.04 | yes |
| 20201225P0039 | ARC | 53 | female | os | -0.25DS-0.34DC*100 | C1N3P3 | 23.9  | 23.66 | yes |
| 20201225P0022 | ARC | 75 | female | os | +1.25DS+1.50DC*170 | C2N3P2 | 23.26 | 23.29 | yes |
| 20201225P0101 | ARC | 65 | male   | od | -0.25DS-0.25DC*67  | C2N4P2 | 23.46 | 23.2  | yes |
| 20200918P0051 | ARC | 68 | female | od | -1.50DC*45         | C4N4P4 | 23.71 | 23.49 |     |
| 20201225P0115 | ARC | 91 | female | os | -1.50DC*92         | C4N4P4 | 23.44 | 22.95 |     |
| 20201225P0114 | ARC | 82 | female | od | -0.50DC*45         | C4N3P3 | 23.4  | 23.38 |     |
| 20201225P0027 | HM  | 28 | female | od | -6.37DS-0.87DC*2   |        | 26.64 | 26.56 |     |
| 20201225P0092 | HM  | 27 | male   | od | -11.00DS-3.00DC*5  |        | 29.61 | 28.36 |     |
| 20201225P0130 | HM  | 31 | female | od | -8.37DS-1.25DC*2   |        | 28.64 | 27.67 |     |
| 20201225P0078 | HM  | 21 | male   | od | -14.50DS-0.25DC*7  |        | 29.32 | 28.78 |     |
| 20201225P0018 | HM  | 26 | female | od | -10.00DS-0.25DC*25 |        | 28.38 | 28.17 |     |
| 20201225P0035 | HM  | 23 | male   | od | -8.00DS-3.00DC*175 |        | 29.12 | 28.76 | yes |
| 20200918P0029 | HM  | 49 | female | od | -10.25DS           |        | 26    | 26    | yes |
| 20200918P0041 | HM  | 26 | male   | od | -7.50DS-1.75DC*175 |        | 27.31 | 27.43 | yes |
| 20201225P0049 | HM  | 20 | female | od | -7.25DS-1.25DC*38  |        | 27.92 | 25.17 | yes |
| 20201225P0020 | HM  | 39 | female | od | -4.75DS            |        | 26.71 | 26.74 | yes |
| 20201225P0090 | HM  | 40 | male   | od | -4.75DS            |        | 26.49 | 26.67 | yes |
| 20201225P0142 | HMC | 58 | male   | od | -5.50DS-0.50DC*90  | C2N2P2 | 25.64 | 25.67 | yes |
| 20201225P0129 | HMC | 54 | male   | od | -4.25DS-3.00DC*170 | C2N3P3 | 26.53 | 26.15 | yes |

|               |     |    |        |    |                     |        |       |       |     |
|---------------|-----|----|--------|----|---------------------|--------|-------|-------|-----|
| 20200918P0045 | HMC | 52 | male   | os | -5.00DS             | C1N1P4 | 26.74 | 26.51 |     |
| 20200918P0050 | HMC | 72 | female | od | -15.00DS-0.50DC*85  | C3N4P2 | 29.72 | 26.94 |     |
| 20201225P0155 | HMC | 57 | male   | os | -7.00DS-1.00DC*75   | C2N2P2 | 27.14 | 26.92 |     |
| 20201225P0103 | HMC | 37 | male   | od | -25.75DS            | C2N2P3 | 33.8  | 25.74 |     |
| 20201225P0031 | HMC | 59 | female | os | -9.25DS-0.50DC*16   | C3N2P2 | 28    | 29.17 |     |
| 20201225P0024 | HMC | 55 | female | od | -9.00DS-0.25DC*25   | C3N4P2 | 28.05 | 25.34 |     |
| 20201225P0074 | HMC | 52 | male   | od | -8.50DS -0.75DC 167 | C2N2P2 | 27.75 | 24.6  |     |
| 20201225P0010 | HMC | 41 | male   | od | -8.00DS-1.00DC*5    | C2N2P2 | 26.05 | 26.12 |     |
| 20201225P0146 | HMC | 58 | female | os | -16.00DS-1.50DC*121 | C2N4P4 | 27.17 | 30.06 |     |
| 20201225P0080 | HMC | 62 | male   | os | -7.50DS-1.00DC*75   | C2N2P2 | 25.79 | 26.32 |     |
| 20201225P0026 | HMC | 68 | female | os | -7.00DS-1.50DC*175  | C3N2P2 | 27.06 | 25.73 |     |
| 20201225P0050 | HMC | 74 | male   | os | -20.00DS-1.50DC*155 | C2N2P2 | 31.31 | 31.31 |     |
| 20201225P0028 | HMC | 48 | male   | os | -14.25DS-2.25DC*80  | C2N3P2 | 27.42 | 27.48 |     |
| 20201225P0025 | HMC | 76 | female | os | -7.50DS-0.75DC*80   | C2N2P2 | 27.6  | 28.15 |     |
| 20201225P0100 | HMC | 54 | female | os | -23.00DS            | C2N2P2 | 32.49 | 31.5  | yes |
| 20201225P0124 | HMC | 75 | male   | os | -12.00DS-2.50DC*65  | C3N3P2 | 28.98 | 28.99 | yes |
| 20201225P0104 | LM  | 31 | female | od | -2.75DS             |        | 24.57 | 24.47 | yes |
| 20201225P0148 | LM  | 27 | female | od | -5.00DS             |        | 25.5  | 25.37 | yes |
| 20201225P0141 | LM  | 28 | female | od | -5.25DS-2.00DC*5    |        | 25.07 | 25.96 | yes |
| 20201225P0058 | LM  | 24 | male   | od | -3.25DS             |        | 25.36 | 25.39 | yes |
| 20201225P0159 | LM  | 36 | female | od | -5.00DS             |        | 25.61 | 25.47 | yes |
| 20201225P0088 | LM  | 30 | female | od | -4.75DS             |        | 24.81 | 24.85 | yes |
| 20201225P0145 | LM  | 23 | female | os | -3.75DS             |        | 25.86 | 25.86 | yes |
| 20201225P0158 | LM  | 24 | female | od | -5.25DS             |        | 24.41 | 24.51 | yes |
| 20201225P0138 | LM  | 24 | female | od | -5.00DS             |        | 23    | 23    | yes |
| 20200918P0025 | LM  | 31 | female | od | -5.25DS-1.00DC*12   |        | 24.68 | 24.12 | yes |
| 20200918P0006 | HM  | 20 | male   | od | -10.87DS-4.37DC*1   |        | 30.9  | 27.88 | yes |
| 20200918P0024 | HMC | 37 | female | od | -23.00DS            | C1N1P3 | 32.04 | 30.84 | yes |
| 20200918P0023 | HMC | 41 | female | od | -25.00DS-1.50DC*162 | C3N4P2 | 33.64 | 32.41 | yes |
| 20200918P0033 | HMC | 60 | male   | od | -21.50DS            | C3N3P2 | 28.68 | 29.31 |     |
| 20200918P0042 | HMC | 49 | female | od | -24.00DS-2.25DC*135 | C2N2P2 | 32.6  | 31.87 |     |
| 20201225P0069 | HMC | 51 | male   | od | -29.00DS            | C2N2P2 | 31.48 | 30.97 |     |
| 20201225P0156 | HMC | 53 | female | os | -20.00DS-1.00DC*70  | C2N2P2 | 31.49 | 31.17 |     |
| 20201225P0064 | HMC | 46 | male   | od | -14.00DS            | C2N2P2 | 28.8  | 28.56 |     |
| 20201225P0113 | HMC | 58 | female | od | -6.00DS             | C3N2P3 | 26.34 | 25.74 |     |
| 20201225P0125 | HMC | 69 | male   | os | -8.5DS-1.50DC*85    | C2N2P2 | 31.42 | 30.18 |     |
| 20201225P0099 | HMC | 54 | male   | od | -15.50DS-1.50DC*20  | C2N3P2 | 25.93 | 25.96 |     |
| 20201225P0004 | HMC | 52 | female | os | -15.00DS-0.50DC*7   | C2N2P2 | 29.07 | 30.06 |     |
| 20201225P0144 | HMC | 50 | female | os | -3.00DS             | C2N3P2 | 26.83 | 26.73 |     |
| 20201225P0057 | HMC | 55 | male   | od | -11.00DS            | C2N2P2 | 31.18 | 32.42 |     |
| 20201225P0165 | HMC | 63 | male   | os | -22.50DS            | C5N4P2 | 28.94 | 28.85 |     |

**Table S2.** Multiple reaction monitoring transitions of steroid hormones

| Steroid Hormone | IS  | Mod e | Quantitati ve | Parent transition (m/z) | Product transition (m/z) | Declustering Potential (Volt) | Collision Energy (Volt) |
|-----------------|-----|-------|---------------|-------------------------|--------------------------|-------------------------------|-------------------------|
| 17OHPr          | no  | neg   | yes           | 331.2                   | 287.1                    | -55                           | -28                     |
| 17OHPr          | no  | neg   |               | 331.2                   | 313.3                    | -55                           | -28                     |
| 17OHPr          | yes | neg   |               | 335.2                   | 316.3                    | -60                           | -28                     |
| DHEAS           | no  | neg   | yes           | 367.3                   | 79.9                     | -90                           | -42                     |
| DHEAS           | yes | neg   |               | 373.2                   | 80.1                     | -120                          | -135                    |
| E1              | no  | neg   | yes           | 269.1                   | 145                      | -150                          | -48                     |
| E1              | no  | neg   |               | 269.1                   | 143                      | -150                          | -38                     |
| E1              | yes | neg   |               | 273.1                   | 147                      | -90                           | -53                     |
| E2              | no  | neg   |               | 271.1                   | 183.1                    | -170                          | -54                     |
| E2              | no  | neg   | yes           | 271.1                   | 145                      | -170                          | -51                     |
| E2              | yes | neg   |               | 274.1                   | 185                      | -170                          | -52                     |
| E3              | no  | neg   |               | 287.3                   | 143.3                    | -130                          | -65                     |
| E3              | no  | neg   | yes           | 287.3                   | 171.3                    | -130                          | -47                     |
| E3              | yes | neg   |               | 290.1                   | 174                      | -170                          | -47                     |
| 11DOC           | no  | pos   | yes           | 347.11                  | 109                      | 115                           | 40                      |
| 11DOC           | no  | pos   |               | 347.11                  | 97                       | 115                           | 38                      |
| 11DOC           | yes | pos   |               | 352.2                   | 100.1                    | 130                           | 31                      |
| 17OHP           | no  | pos   | yes           | 331                     | 97.1                     | 120                           | 27                      |
| 17OHP           | no  | pos   |               | 331                     | 109.1                    | 130                           | 46                      |
| 17OHP           | yes | pos   |               | 334.2                   | 100                      | 100                           | 30                      |
| 21DOC           | no  | pos   | yes           | 347.3                   | 311.1                    | 80                            | 18                      |
| 21DOC           | no  | pos   |               | 347.3                   | 269.4                    | 80                            | 25                      |
| 21DOC           | yes | pos   |               | 355.2                   | 180                      | 60                            | 28                      |
| A2              | no  | pos   | yes           | 287.112                 | 97.1                     | 100                           | 28                      |
| A2              | no  | pos   |               | 287.112                 | 109                      | 100                           | 36                      |
| A2              | yes | pos   |               | 290.2                   | 100.1                    | 71                            | 35                      |
| ALD             | no  | pos   | yes           | 361.1                   | 343                      | 110                           | 25                      |
| ALD             | no  | pos   |               | 361.1                   | 315.2                    | 110                           | 28                      |
| ALD             | yes | pos   |               | 368.2                   | 350.2                    | 76                            | 25                      |
| COR             | no  | pos   | yes           | 361.3                   | 163.3                    | 120                           | 31                      |
| COR             | no  | pos   |               | 361.3                   | 121                      | 120                           | 39                      |
| COR             | yes | pos   |               | 368.2                   | 169.1                    | 76                            | 35                      |
| CORT            | no  | pos   |               | 347.2                   | 121                      | 80                            | 32                      |
| CORT            | no  | pos   | yes           | 347.2                   | 329.1                    | 80                            | 20                      |
| CORT            | yes | pos   |               | 355.3                   | 337.2                    | 90                            | 22                      |
| DHEA            | no  | pos   | yes           | 271.183                 | 213.1                    | 100                           | 24                      |
| DHEA            | no  | pos   |               | 271.183                 | 197.3                    | 100                           | 27                      |
| DHEA            | yes | pos   |               | 277.2                   | 219.3                    | 75                            | 24                      |
| DHT             | no  | pos   | yes           | 291.2                   | 255.2                    | 90                            | 22                      |
| DHT             | no  | pos   |               | 291.2                   | 273.1                    | 90                            | 22                      |
| DHT             | yes | pos   |               | 294.3                   | 258.2                    | 80                            | 22                      |



|     |     |     |     |         |       |     |    |
|-----|-----|-----|-----|---------|-------|-----|----|
| DOC | no  | pos | yes | 331.2   | 109   | 80  | 31 |
| DOC | no  | pos |     | 331.2   | 96.8  | 100 | 26 |
| DOC | yes | pos |     | 339.3   | 100   | 100 | 29 |
| F   | no  | pos |     | 363.13  | 121.1 | 120 | 41 |
| F   | no  | pos | yes | 363.13  | 327.3 | 120 | 25 |
| F   | yes | pos |     | 367.2   | 121.1 | 66  | 35 |
| P   | no  | pos | yes | 315.1   | 97.1  | 120 | 25 |
| P   | no  | pos |     | 315.1   | 109.1 | 120 | 30 |
| P   | yes | pos |     | 318.2   | 100.1 | 95  | 50 |
| Pr  | no  | pos | yes | 299.2   | 281.3 | 100 | 22 |
| Pr  | no  | pos |     | 299.2   | 159.2 | 100 | 30 |
| Pr  | yes | pos |     | 321.3   | 285.2 | 40  | 16 |
| T   | no  | pos | yes | 289.135 | 97    | 100 | 30 |
| T   | no  | pos |     | 289.135 | 109   | 100 | 34 |
| T   | yes | pos |     | 292.2   | 100   | 90  | 30 |

**Table S3** The linear and limit of quantification in LC MS/MS for steroid hormones

| Steroid hormone | Actual Concentration(ng/mL) | Mean(ng/mL) | SD     | CV (%) | SNR | R2    |
|-----------------|-----------------------------|-------------|--------|--------|-----|-------|
| F               | 0.06                        | 0.061       | 0.0049 | 8%     | 22  | 0.991 |
| COR             | 0.1                         | 0.095       | 0.0096 | 10%    | 147 | 0.992 |
| 11DOC           | 0.006                       | 0.008       | 0.0015 | 21%    | 13  | 0.992 |
| 17OHP           | 0.02                        | 0.011       | 0.0013 | 12%    | 18  | 0.994 |
| ALD             | 0.005                       | 0.006       | 0.0002 | 3%     | 17  | 0.991 |
| A2              | 0.003                       | 0.002       | 0.0001 | 3%     | 4   | 0.991 |
| DHEA            | 0.03                        | 0.032       | 0.0030 | 10%    | 71  | 0.990 |
| T               | 0.01                        | 0.010       | 0.0009 | 9%     | 41  | 0.997 |
| 17OHPr          | 0.32                        | 0.301       | 0.0284 | 9%     | 23  | 0.996 |
| 21DOC           | 0.05                        | 0.052       | 0.0033 | 6%     | 6   | 0.990 |
| DHEAS           | 1                           | 0.902       | 0.0456 | 5%     | 9   | 0.991 |
| E3              | 0.02                        | 0.019       | 0.0013 | 7%     | 4   | 0.997 |
| Pr              | 1.25                        | 1.164       | 0.0305 | 3%     | 12  | 0.992 |
| P               | 0.01                        | 0.010       | 0.0005 | 5%     | 27  | 0.996 |
| DOC             | 0.005                       | 0.005       | 0.0002 | 3%     | 14  | 0.996 |
| E2              | 0.02                        | 0.021       | 0.0030 | 14%    | 7   | 0.995 |
| E1              | 0.5                         | 0.574       | 0.0414 | 7%     | 77  | 0.990 |
| CORT            | 0.03                        | 0.031       | 0.0015 | 5%     | 18  | 0.995 |
| DHT             | 0.08                        | 0.071       | 0.0024 | 3%     | 27  | 0.991 |

**Table S4** The reproducibility in intra- or inter-assays

| Compound | Level | Expected<br>Concentration<br>(ng/ml) | within -run |          |       |          | between- run |          |       |          |
|----------|-------|--------------------------------------|-------------|----------|-------|----------|--------------|----------|-------|----------|
|          |       |                                      | mean(ng/ml) | SD       | CV(%) | accuracy | mean(ng/ml)  | SD       | CV(%) | accuracy |
| 11DOC    | low   | 0.04                                 | 0.04        | 0.0022   | 6%    | -1%      | 0.04         | 0.0021   | 5%    | 0%       |
| 11DOC    | high  | 5.00                                 | 4.99        | 0.3368   | 7%    | 0%       | 4.93         | 0.2880   | 6%    | -1%      |
| 17OHP    | low   | 0.10                                 | 0.10        | 0.0053   | 5%    | -1%      | 0.10         | 0.0051   | 5%    | 2%       |
| 17OHP    | high  | 12.50                                | 12.42       | 0.0994   | 1%    | -1%      | 12.49        | 0.2126   | 2%    | 0%       |
| 17OHPr   | low   | 0.31                                 | 0.34        | 0.0057   | 2%    | 9%       | 0.34         | 0.0194   | 6%    | 8%       |
| 17OHPr   | high  | 40.00                                | 40.24       | 3.2788   | 8%    | 1%       | 39.69        | 2.8400   | 7%    | -1%      |
| 21DOC    | low   | 0.20                                 | 0.19        | 0.0072   | 4%    | -3%      | 0.19         | 0.0141   | 7%    | -1%      |
| 21DOC    | high  | 25.00                                | 24.82       | 1.3845   | 6%    | -1%      | 24.72        | 1.0668   | 4%    | -1%      |
| A2       | low   | 0.04                                 | 0.04        | 0.0035   | 9%    | 1%       | 0.04         | 0.0034   | 9%    | 1%       |
| A2       | high  | 5.00                                 | 4.98        | 0.1715   | 3%    | 0%       | 4.97         | 0.1404   | 3%    | -1%      |
| ALD      | low   | 0.02                                 | 0.02        | 0.0013   | 7%    | -4%      | 0.02         | 0.0015   | 8%    | -1%      |
| ALD      | high  | 2.50                                 | 2.57        | 0.2237   | 9%    | 3%       | 2.39         | 0.2645   | 11%   | -4%      |
| COR      | low   | 0.39                                 | 0.40        | 0.0386   | 10%   | 1%       | 0.39         | 0.0269   | 7%    | 1%       |
| COR      | high  | 50.00                                | 51.54       | 3.9006   | 8%    | 3%       | 50.34        | 3.1974   | 6%    | 1%       |
| CORT     | low   | 0.12                                 | 0.12        | 0.0077   | 7%    | -1%      | 0.11         | 0.0087   | 8%    | -5%      |
| CORT     | high  | 15.00                                | 16.09       | 0.9567   | 6%    | 7%       | 15.65        | 0.8692   | 6%    | 4%       |
| DHEA     | low   | 0.12                                 | 0.13        | 0.0032   | 3%    | 10%      | 0.13         | 0.0038   | 3%    | 10%      |
| DHEA     | high  | 15.00                                | 14.59       | 1.2189   | 8%    | -3%      | 15.19        | 1.1425   | 8%    | 1%       |
| DHEAS    | low   | 31.25                                | 32.58       | 2.3529   | 7%    | 4%       | 30.73        | 2.6831   | 9%    | -2%      |
| DHEAS    | high  | 4000.00                              | 4069.69     | 319.3828 | 8%    | 2%       | 4157.46      | 278.1861 | 7%    | 4%       |
| DHT      | low   | 0.08                                 | 0.07        | 0.0046   | 6%    | -4%      | 0.08         | 0.0052   | 7%    | -2%      |
| DHT      | high  | 10.00                                | 9.67        | 0.9225   | 10%   | -3%      | 10.23        | 1.0807   | 11%   | 2%       |
| DOC      | low   | 0.02                                 | 0.02        | 0.0017   | 9%    | 0%       | 0.02         | 0.0015   | 8%    | -3%      |
| DOC      | high  | 2.50                                 | 2.49        | 0.0743   | 3%    | 0%       | 2.51         | 0.0698   | 3%    | 0%       |
| E1       | low   | 0.50                                 | 0.55        | 0.0441   | 8%    | 11%      | 0.57         | 0.0406   | 7%    | 14%      |
| E1       | high  | 4.00                                 | 3.67        | 0.2191   | 6%    | -8%      | 3.69         | 0.1564   | 4%    | -8%      |
| E2       | low   | 0.08                                 | 0.08        | 0.0097   | 13%   | -1%      | 0.08         | 0.0099   | 12%   | 5%       |
| E2       | high  | 10.00                                | 10.20       | 0.1842   | 2%    | 2%       | 10.15        | 0.2564   | 3%    | 1%       |
| E3       | low   | 0.04                                 | 0.04        | 0.0047   | 11%   | 9%       | 0.08         | 0.0109   | 14%   | 4%       |
| E3       | high  | 5.00                                 | 4.83        | 0.4843   | 10%   | -3%      | 5.04         | 0.5181   | 10%   | 1%       |
| F        | low   | 0.98                                 | 1.03        | 0.0415   | 4%    | 6%       | 1.04         | 0.0341   | 3%    | 7%       |
| F        | high  | 125.00                               | 127.59      | 2.2245   | 2%    | 2%       | 127.90       | 2.8778   | 2%    | 2%       |
| P        | low   | 0.08                                 | 0.08        | 0.0026   | 3%    | -3%      | 0.08         | 0.0063   | 8%    | 0%       |
| P        | high  | 10.00                                | 9.97        | 0.4228   | 4%    | 0%       | 9.92         | 0.3287   | 3%    | -1%      |
| Pr       | low   | 1.25                                 | 1.23        | 0.0796   | 6%    | -2%      | 1.24         | 0.0778   | 6%    | -1%      |
| Pr       | high  | 40.00                                | 40.73       | 2.4441   | 6%    | 2%       | 41.88        | 8.3702   | 20%   | 5%       |
| T        | low   | 0.08                                 | 0.07        | 0.0024   | 3%    | -5%      | 0.08         | 0.0045   | 6%    | -3%      |
| T        | high  | 10.00                                | 9.99        | 0.2458   | 2%    | 0%       | 10.05        | 0.1957   | 2%    | 1%       |

**Table S5** The average concentration of steroid hormones in AHs and plasma

| Compound           | plasma (n=107) |         | AH (n=107)   |       |
|--------------------|----------------|---------|--------------|-------|
|                    | Mean (ng/mL)   | SD      | Mean (ng/mL) | SD    |
| DOC                | 0.036          | 0.029   | /            | /     |
| E2                 | 0.063          | 0.071   | /            | /     |
| E1                 | 0.166          | 0.020   | /            | /     |
| DHT                | 0.248          | 0.267   | /            | /     |
| 11DOC              | 0.326          | 0.318   | 0.068        | 0.016 |
| 21DOC              | 0.57           | 0.42    |              |       |
| ALD                | 0.642          | 0.194   | 0.073        | 0.032 |
| A2                 | 0.704          | 0.360   | 0.073        | 0.039 |
| 17OHP              | 1.037          | 0.932   | /            | /     |
| P                  | 1.670          | 3.901   | /            | /     |
| T                  | 1.827          | 2.242   | /            | /     |
| 17OHP <sub>r</sub> | 2.125          | 2.497   | /            | /     |
| Pr                 | 2.703          | 1.401   | /            | /     |
| CORT               | 2.831          | 2.197   | 0.455        | 0.147 |
| DHEA               | 3.234          | 2.049   | /            | /     |
| COR                | 17.200         | 5.258   | 1.082        | 0.481 |
| F                  | 79.859         | 33.245  | 2.102        | 1.225 |
| DHEAS              | 357.471        | 218.308 | /            | /     |
